# Supplementary material for: A novel digital color analysis method for rapid glucose detection
Source: Royal Society of Chemistry journal article supplement (doi:10.1039/c5ay01233c), 2015-01-01
Supplement: c5ay01233c1.pdf [file c5ay01233c1.pdf]

## Electronic Appendix 1

Table S1. The main parameters for Artificial Neural Network (ANNs) construction

| Parameter           | Setting                                                   |
|---------------------|-----------------------------------------------------------|
| Data preprocessing  | $x_{processed} = \frac{(x - x_{min})}{x_{max} - x_{min}}$ |
| Input               | R value at 11 points of time(Fig.7 A)                     |
| Hidden layer number | 5                                                         |
| Output              | The glucose concentration(g/L)                            |
| Activation function | tansig: $y = \frac{2}{1 + e^{-2x}} - 1$                   |
| Training function   | trainlm                                                   |
| Raining goal        | Net.trainparam.goal=0.0004                                |
| Learning rate       | Net.trainparam.lr=0.1                                     |
