# Supplementary material for: A novel digital color analysis method for rapid glucose detection
Source: Royal Society of Chemistry journal article supplement (doi:10.1039/c5ay01233c), 2015-01-01
Supplement: c5ay01233c2.pdf [file c5ay01233c2.pdf]

## Electronic Appendix 2

**The code of Artificial Neural Network for glucose detection in Matlab. Sentences marked with % was the explanation of the code.**

### **% Loading the data**

```
input_train=R values of 80 training samples;  
output_train=glucose concentration of 80 training samples;  
input_test= R values of 20 forecast samples;  
output_test= glucose concentration of 20 forecast samples;
```

### **% Data preprocessing**

```
[inputn,inputps]=mapminmax(input_train);  
[outputn,outputps]=mapminmax(output_train);
```

### **% Setup of artificial neural network**

```
net=newff(inputn,outputn,[5]);
```

```
net.trainParam.epochs=100;  
net.trainParam.lr=0.1;  
net.trainParam.goal=0.00004;
```

### **% Training the network**

```
net=train(net,inputn,outputn);
```

### **% Prediction using the network**

```
inputn_test=mapminmax('apply',input_test,inputps);
```

### **% Output of the prediction results**

```
an=sim(net,inputn_test);
```

### **% Inverse-normalization of the prediction results**

```
BPoutput=mapminmax('reverse',an,outputps);
```

### **% Visualization of the prediction result**

**% Figure 1 is the comparison of prediction results and measured results of the 100 forecast samples**

```
figure(1)  
plot(BPoutput,':og')  
hold on  
plot(output_test,'-*');  
legend('Measured','Predicted')
```

```
title('the prediction results of the ANNs','fontsize',12)
ylabel('R value','fontsize',12)
xlabel('Sample','fontsize',12)
```

```
% Figure 2 is the forecast error of the ANNs model
% error represents the forecast error
error=BPoutput-output_test;
figure(2)
plot(error,'-*')
title(' the forecast error of the ANNs model ','fontsize',12)
ylabel('error','fontsize',12)
xlabel('sample','fontsize',12)
```
