# Supplementary material for: A novel digital color analysis method for rapid glucose detection
Source: Royal Society of Chemistry journal article supplement (doi:10.1039/c5ay01233c), 2015-01-01
Supplement: c5ay01233c3.pdf [file c5ay01233c3.pdf]

Electronic Appendix 3

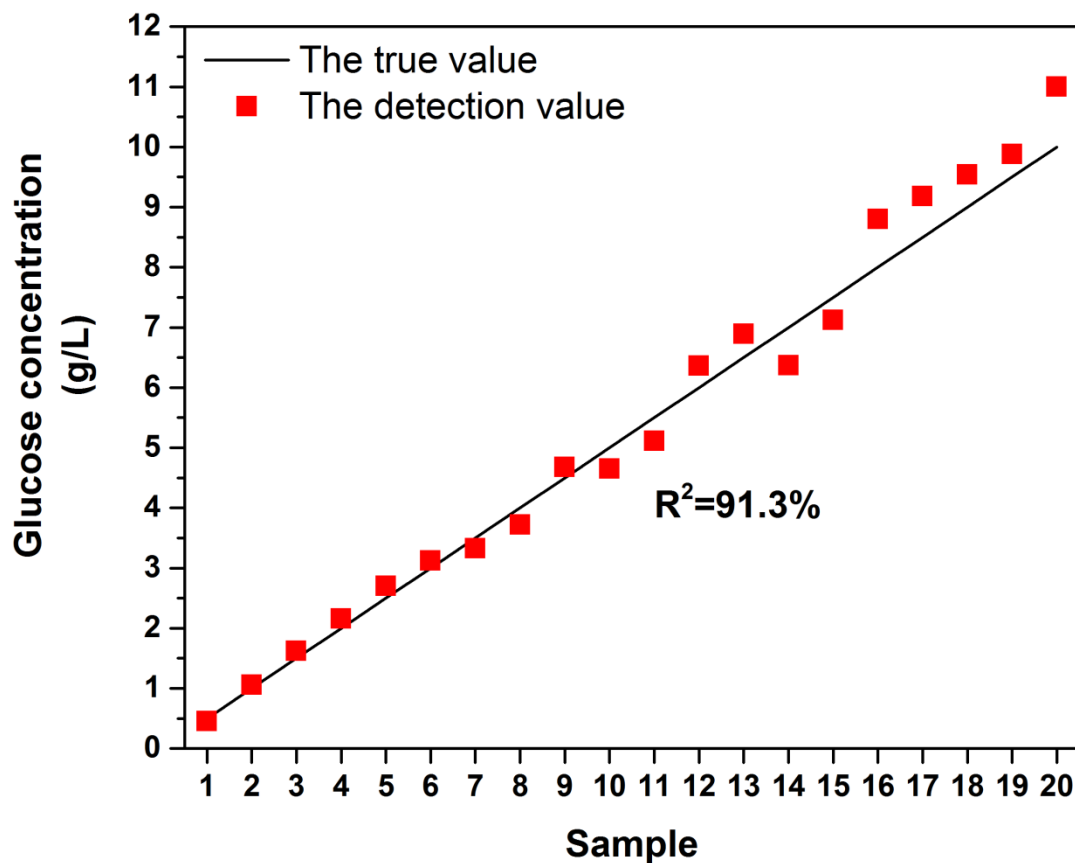

Figure S1: The accuracy validation experiments for nonlinear fitting algorithm for glucose detection. The detection results and the true concentrations of 20 samples were used for comparison.
